# Supplementary material for: Pressure-induced multi-functional property analysis of lead-free tin based halide perovskites ASnCl3 (A = Ga, In, Tl) for advanced optoelectronic applications
Source: Royal Society of Chemistry journal article supplement (doi:10.1039/d5ma00039d), 2025-01-01
Supplement: d5ma00039d1.pdf [file d5ma00039d1.pdf]

## **Pressure-Induced Multi-Functional Property Analysis of Lead Free Tin Based Halide Perovskites $\text{ASnCl}_3$ (A = Ga, In, Tl) for Advanced Optoelectronic Applications**

MD Ratul Hasan<sup>a</sup>, Imtiaz Ahamed Apon<sup>b\*</sup>, Md. Mafidul Islam<sup>a</sup>, Asab Uzzaman Azad<sup>d</sup>, Md. Solayman<sup>a</sup>, Md. Salman Haque<sup>a,c</sup>

<sup>a</sup> Department of Materials Science and Engineering, Khulna University of Engineering & Technology (KUET), Khulna -9203, Bangladesh.

<sup>b</sup> Department of Electrical and Electronic Engineering, Bangladesh Army University of Science and Technology (BAUST), Saidpur-5311, Bangladesh.

<sup>c</sup> Department of Materials and Metallurgical Engineering, Bangladesh University of Engineering and Technology (BUET), Dhaka-1000, Bangladesh.

<sup>d</sup> Faculty of Science, Engineering and Architecture, Laurentian University, Sudbury, Canada.

**Corresponding Authors Email:** [imti8509@gmail.com](mailto:imti8509@gmail.com) (Imtiaz Ahamed Apon\*)

GaSnCl<sub>3</sub> (0 GPa) GGA-PBeSOI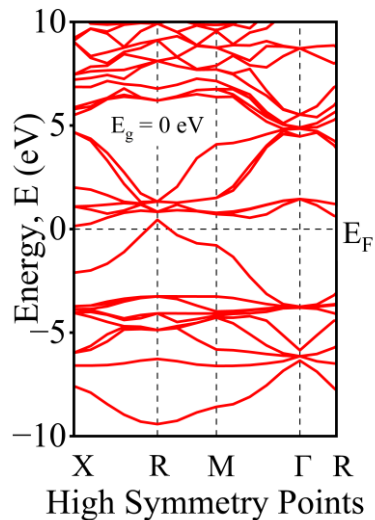GaSnCl<sub>3</sub> (0 GPa) mGGA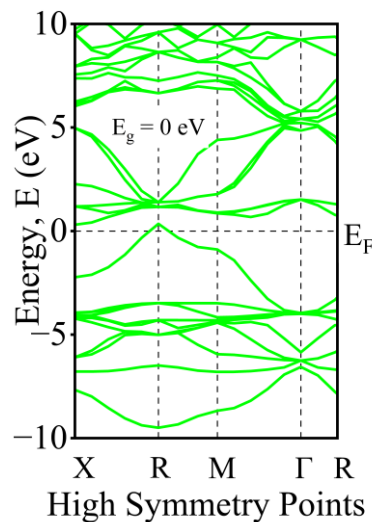InSnCl<sub>3</sub> (0 GPa) GGA-PBeSOI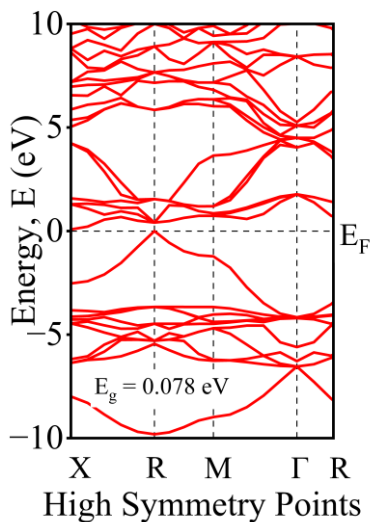InSnCl<sub>3</sub> (0 GPa) mGGA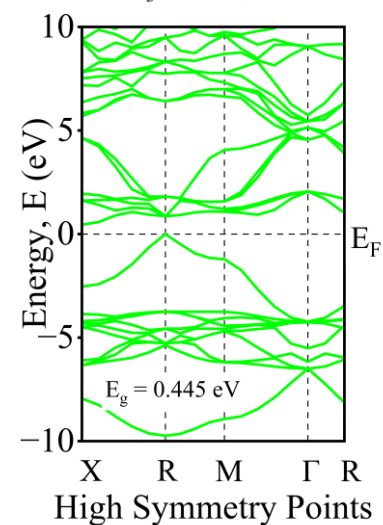TlSnCl<sub>3</sub> (0 GPa) GGA-PBeSOI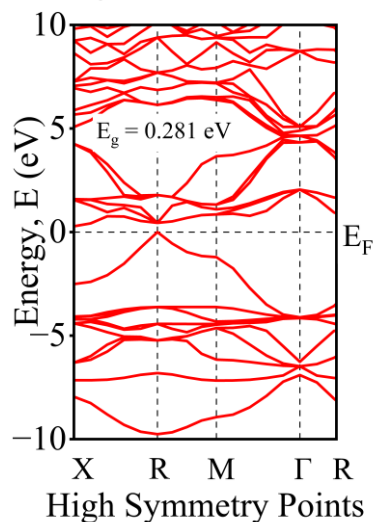TlSnCl<sub>3</sub> (0 GPa) mGGA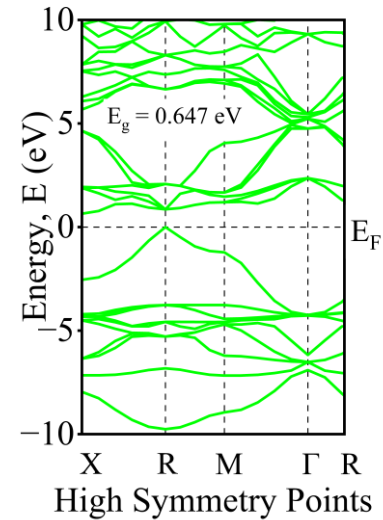

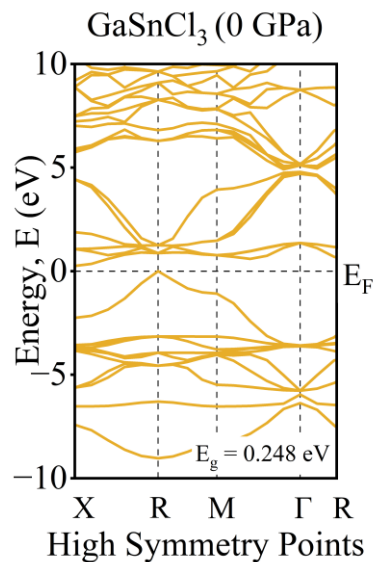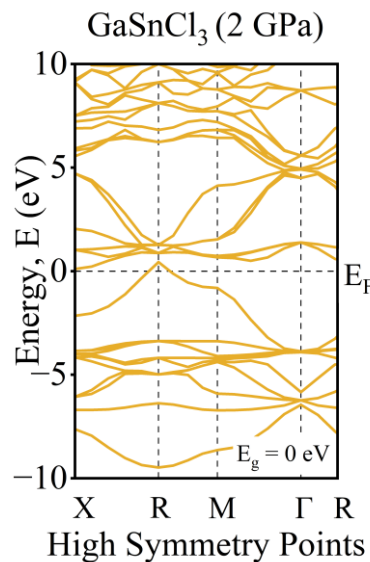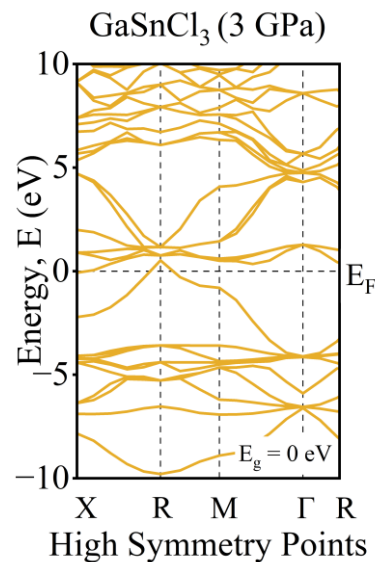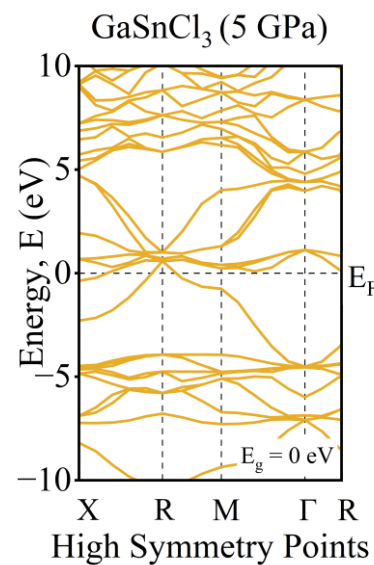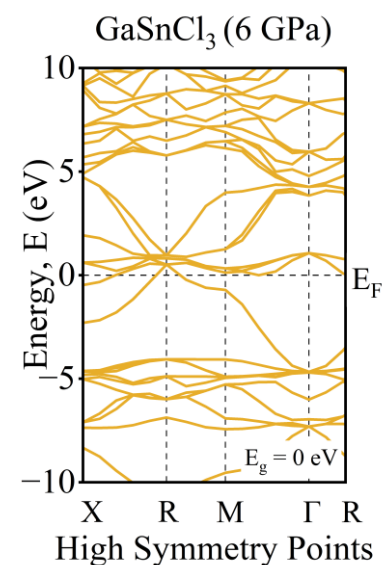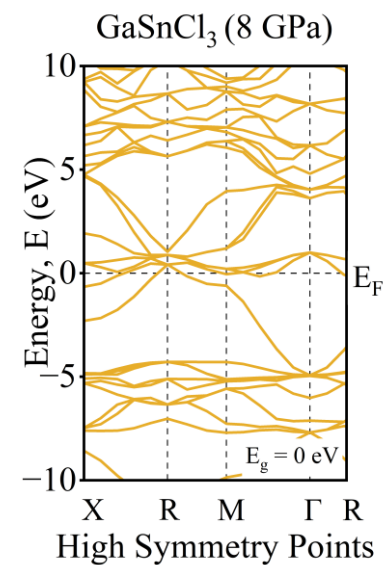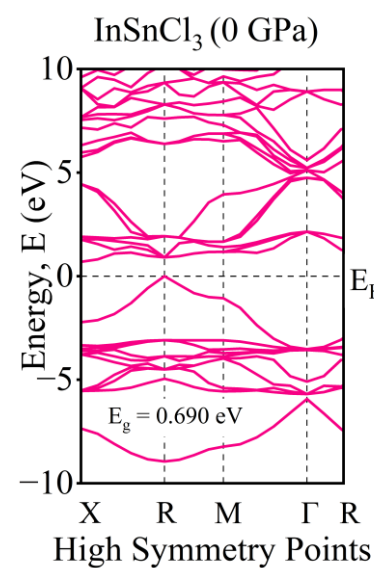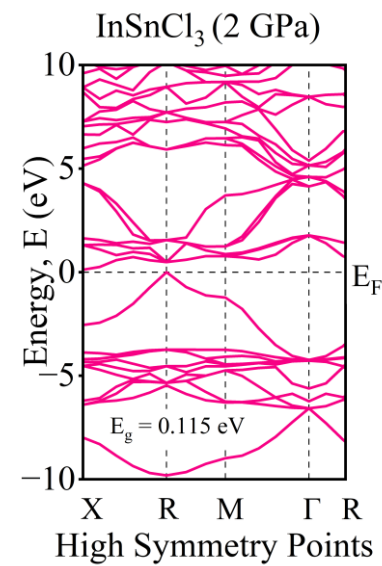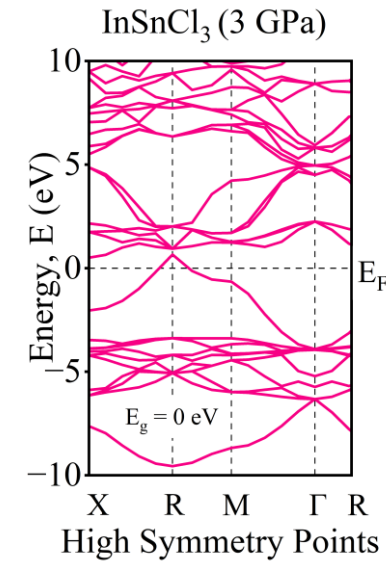

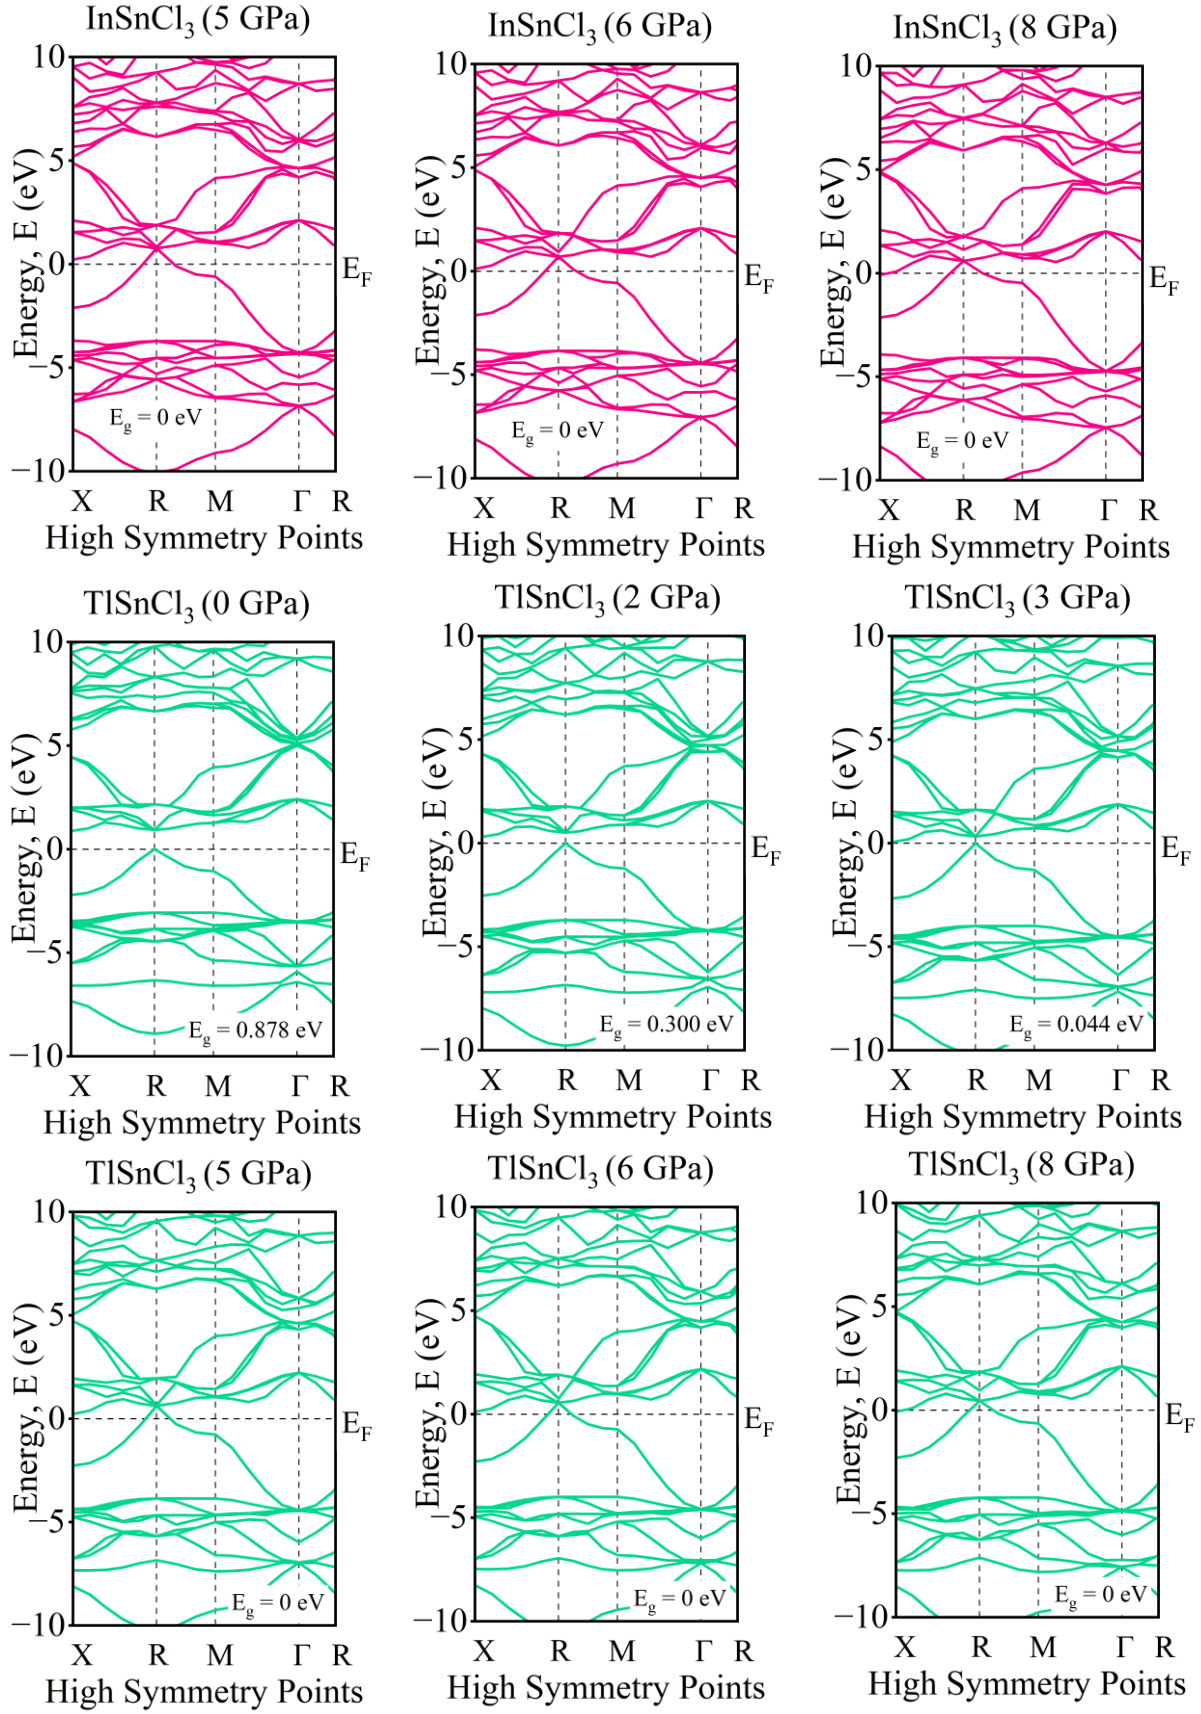

**Fig. 3.** Band structure of  $\text{ASnCl}_3$  ( $A = \text{Ga}, \text{In}, \text{and Tl}$ ) under pressure.

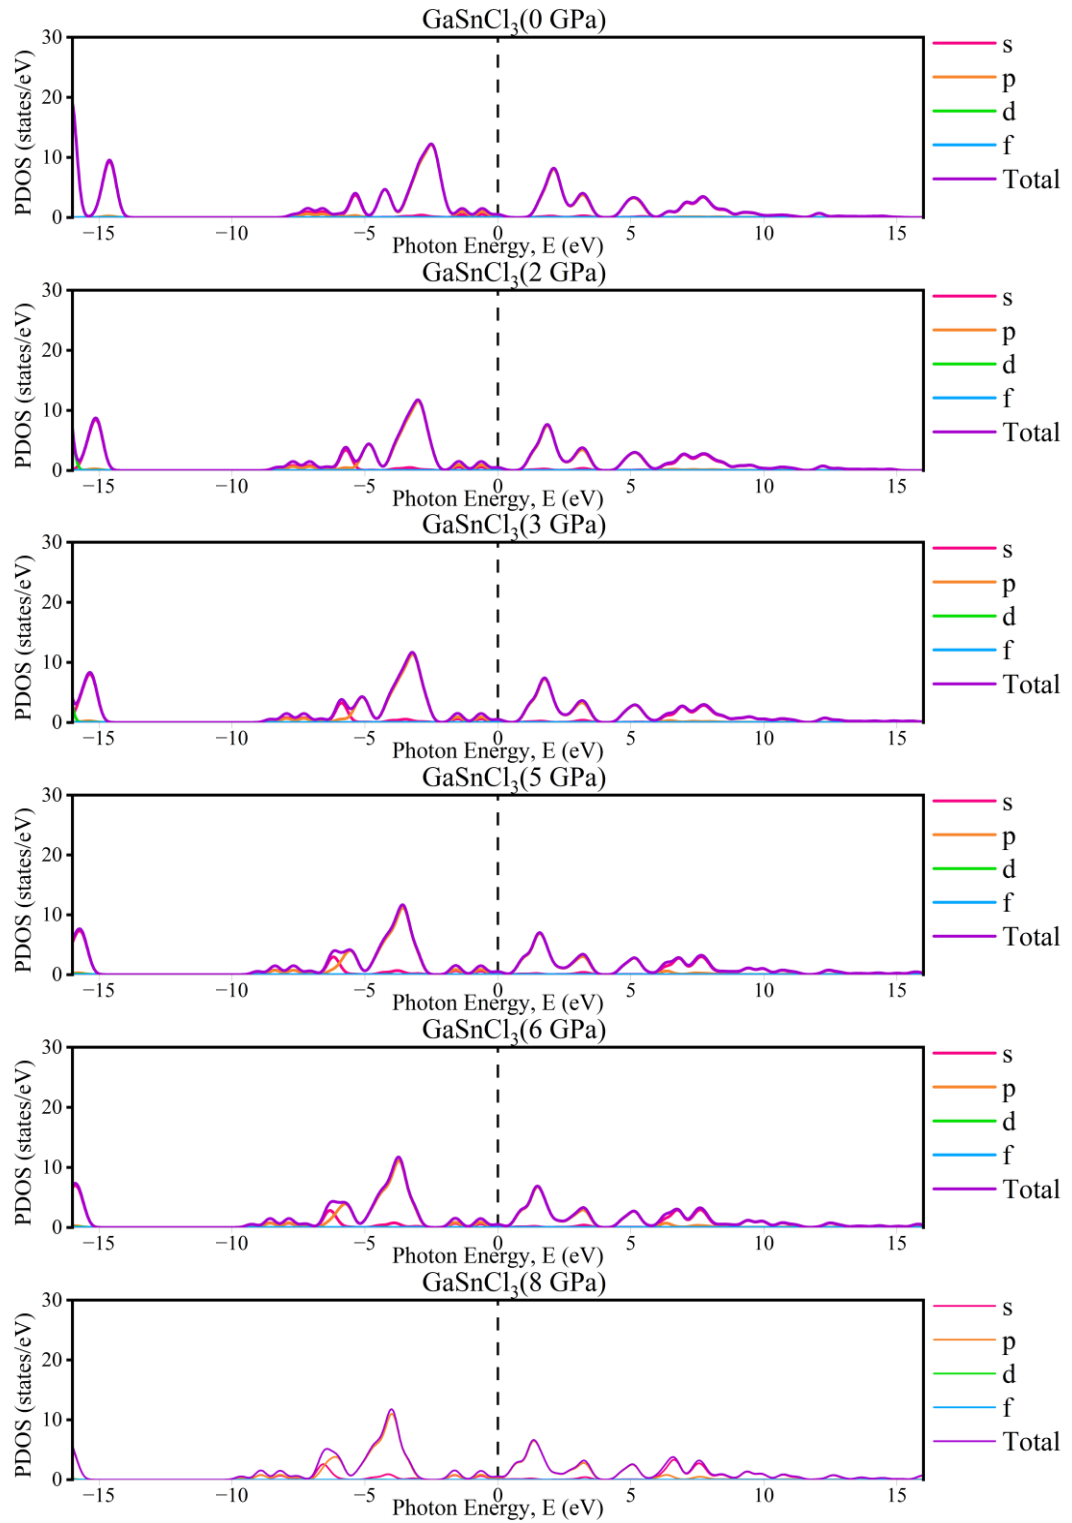

**Fig. 5.** The Partial Density of States (PDOS) of  $\text{ASnCl}_3$  ( $A = \text{Ga}, \text{In}, \text{and Tl}$ ) under pressure.

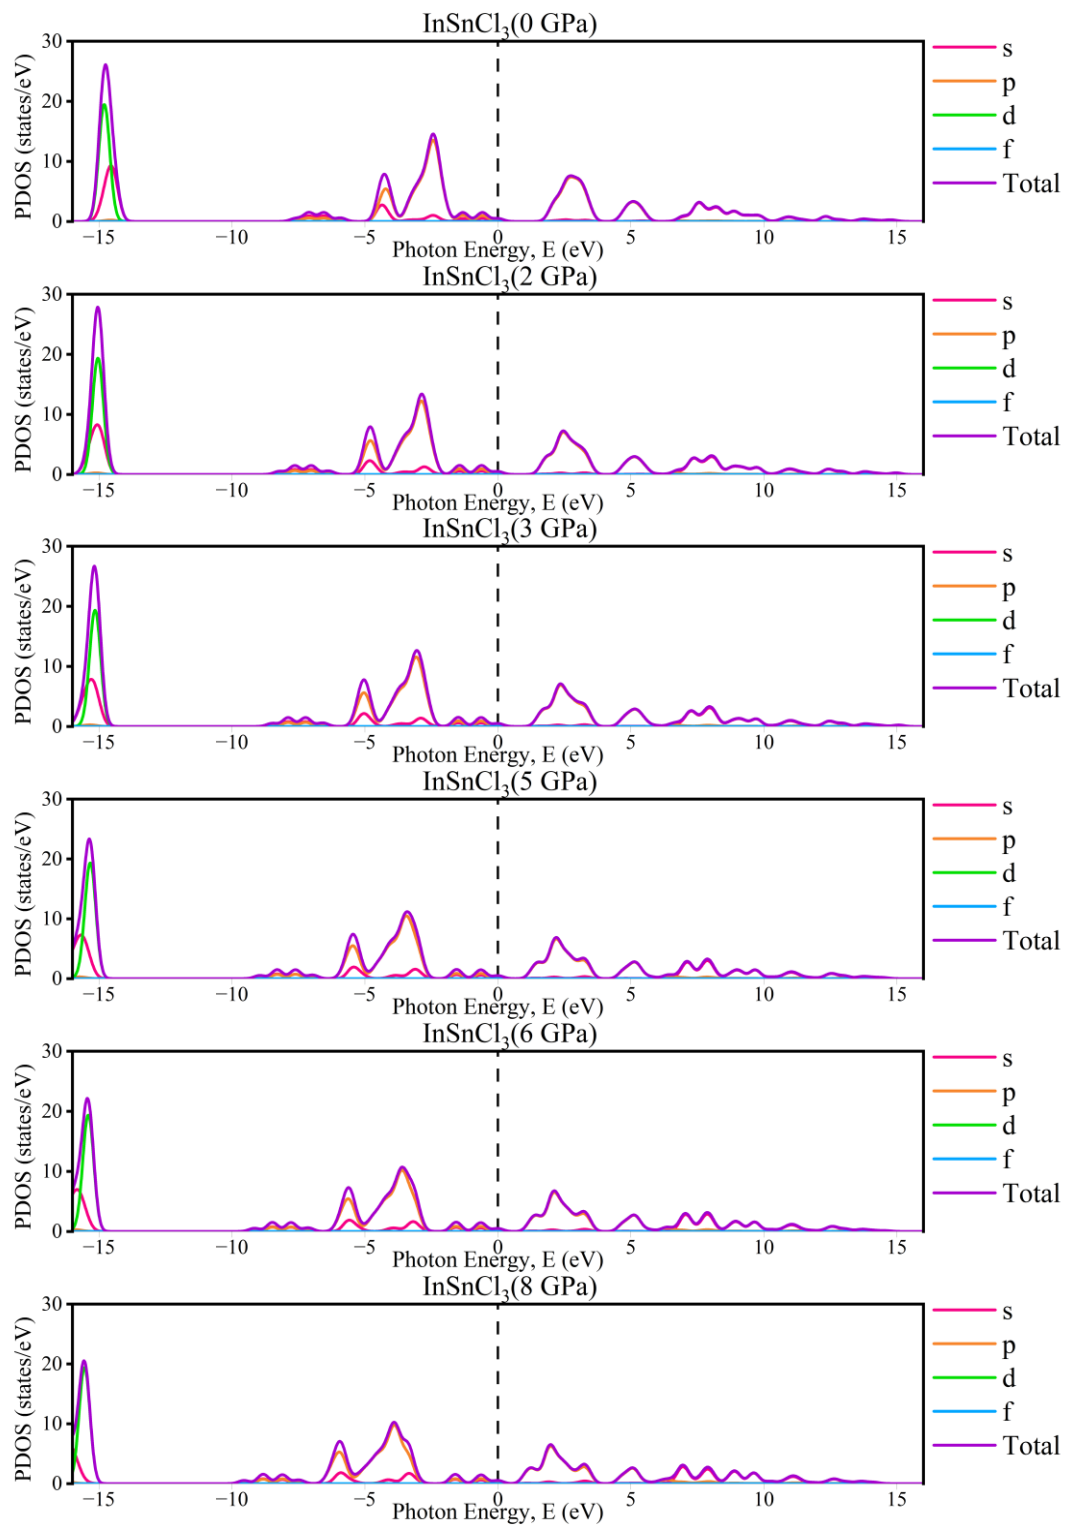

**Fig. 5.** The Partial Density of States (PDOS) of  $\text{ASnCl}_3$  ( $A = \text{Ga}, \text{In}, \text{and Tl}$ ) under pressure.

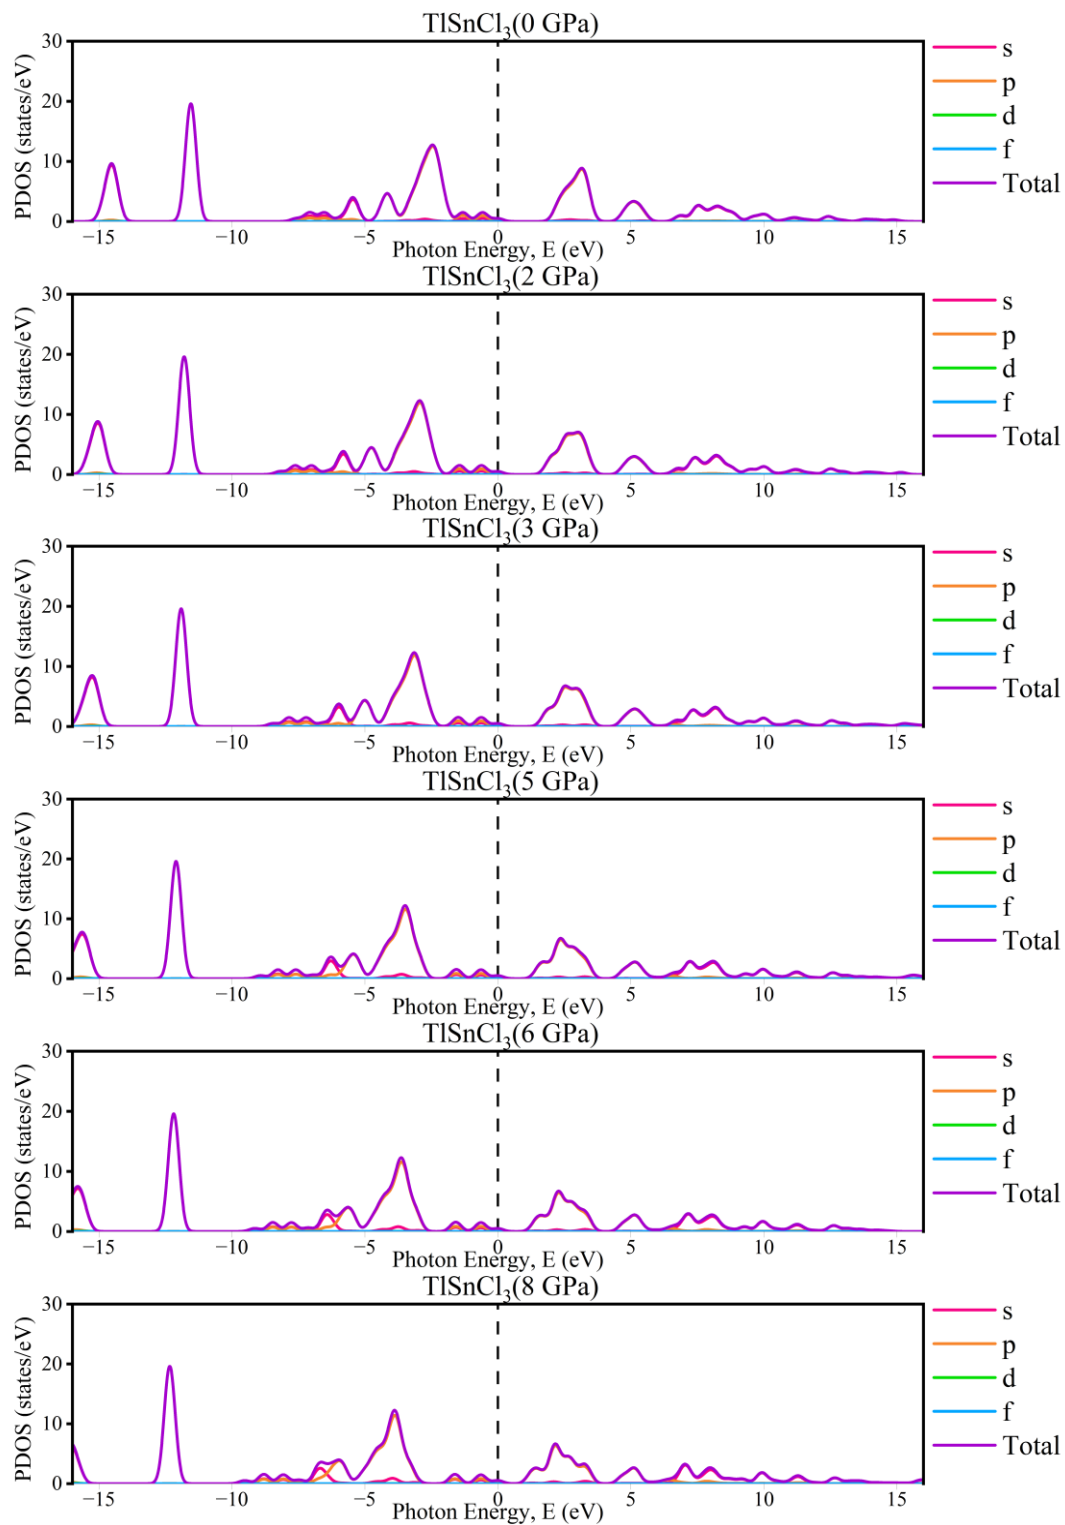

**Fig. 5.** The Partial Density of States (PDOS) of  $\text{ASnCl}_3$  ( $A = \text{Ga}, \text{In}, \text{and Tl}$ ) under pressure.



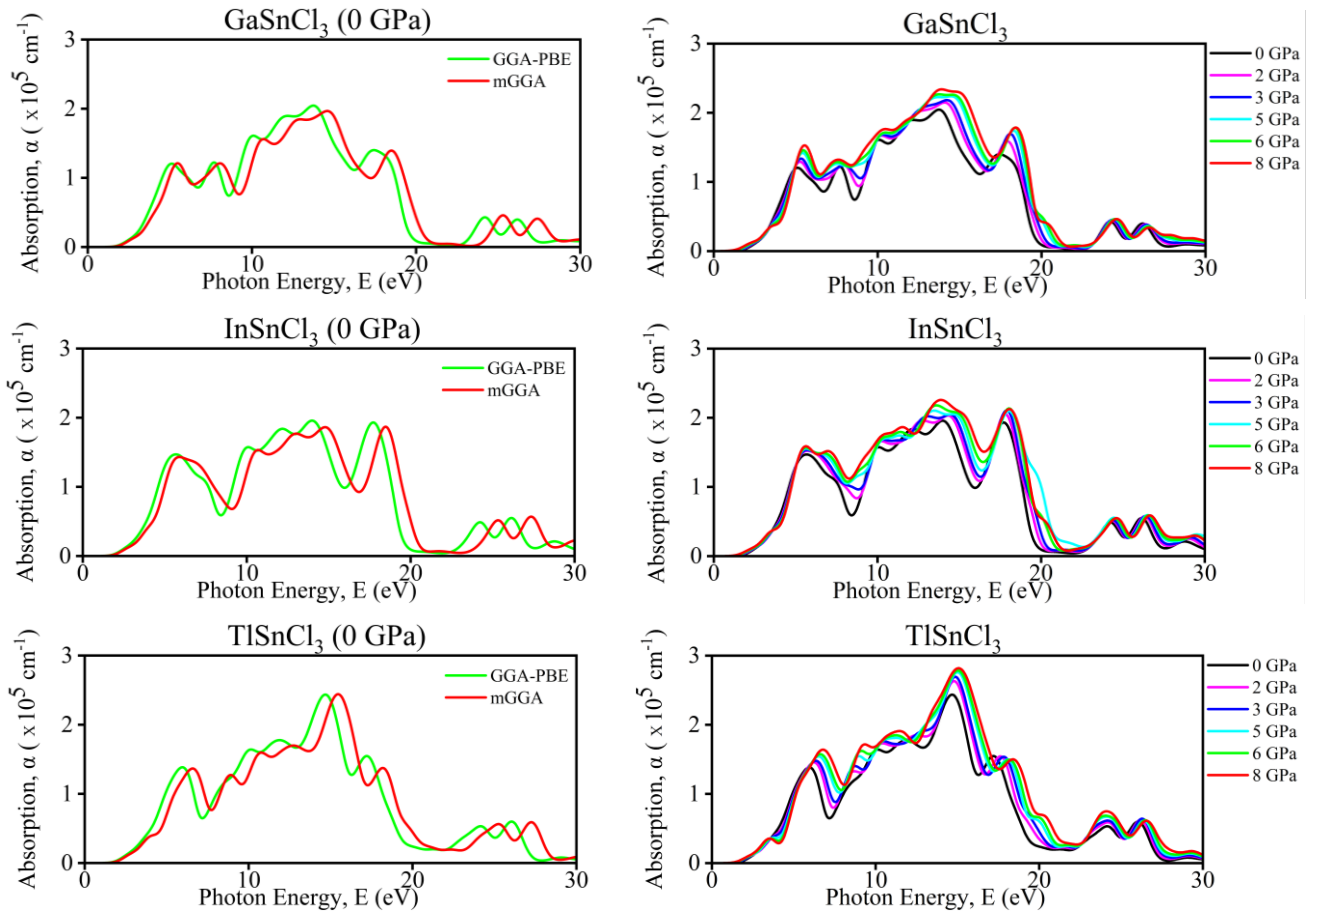

Fig. 7. Calculated pressure-induced spectra of absorption ( $\alpha$ ) for  $\text{ASnCl}_3$  ( $A = \text{Ga, In, and Tl}$ ).

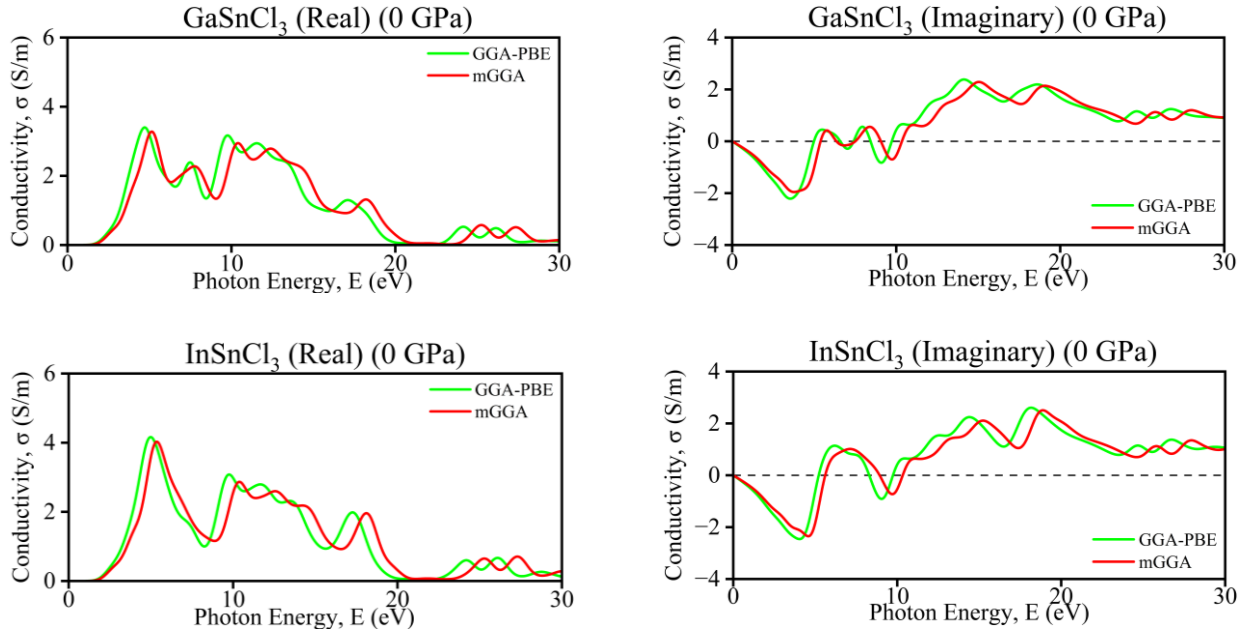



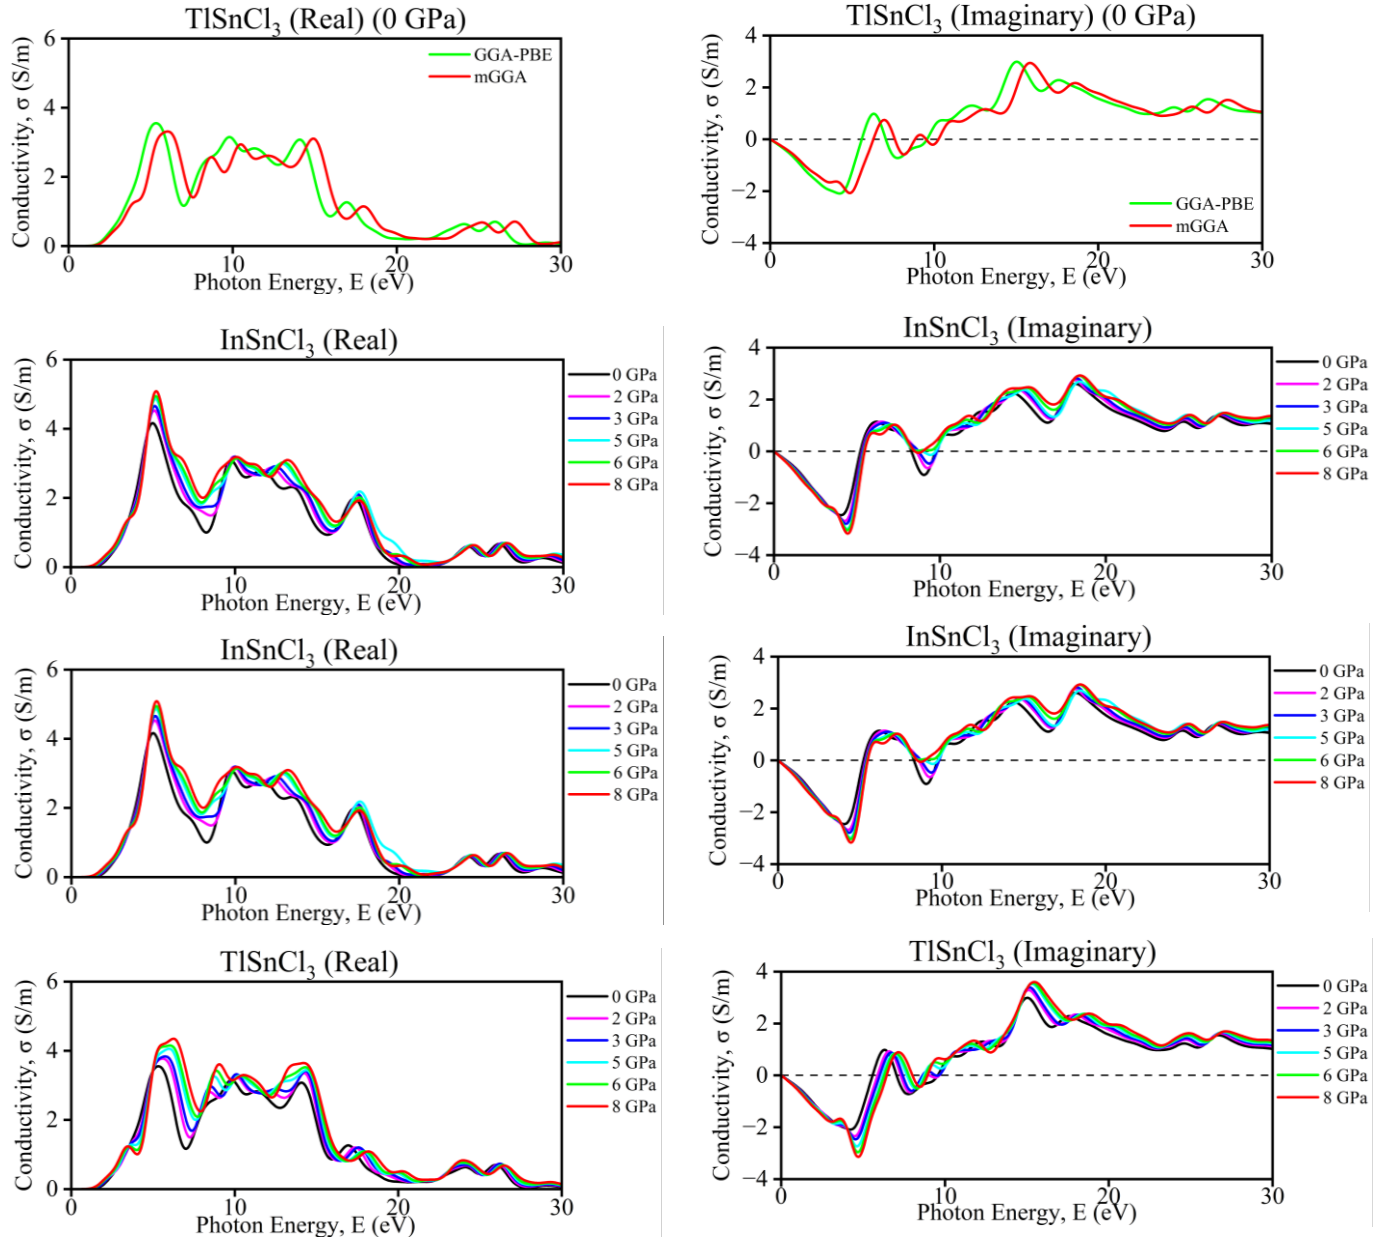

**Fig. 8.** Calculated pressure-induced Imaginary and real spectra of optical conductivity ( $\sigma$ ) for  $\text{ASnCl}_3$  ( $A = \text{Ga}, \text{In}, \text{and Tl}$ ).

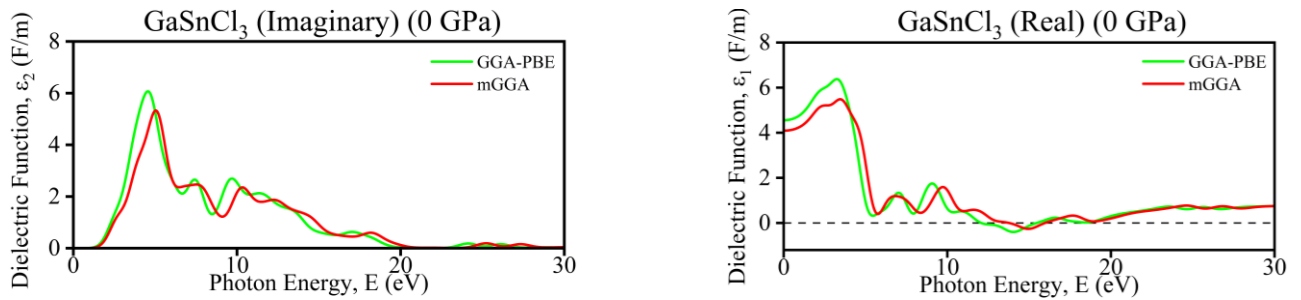

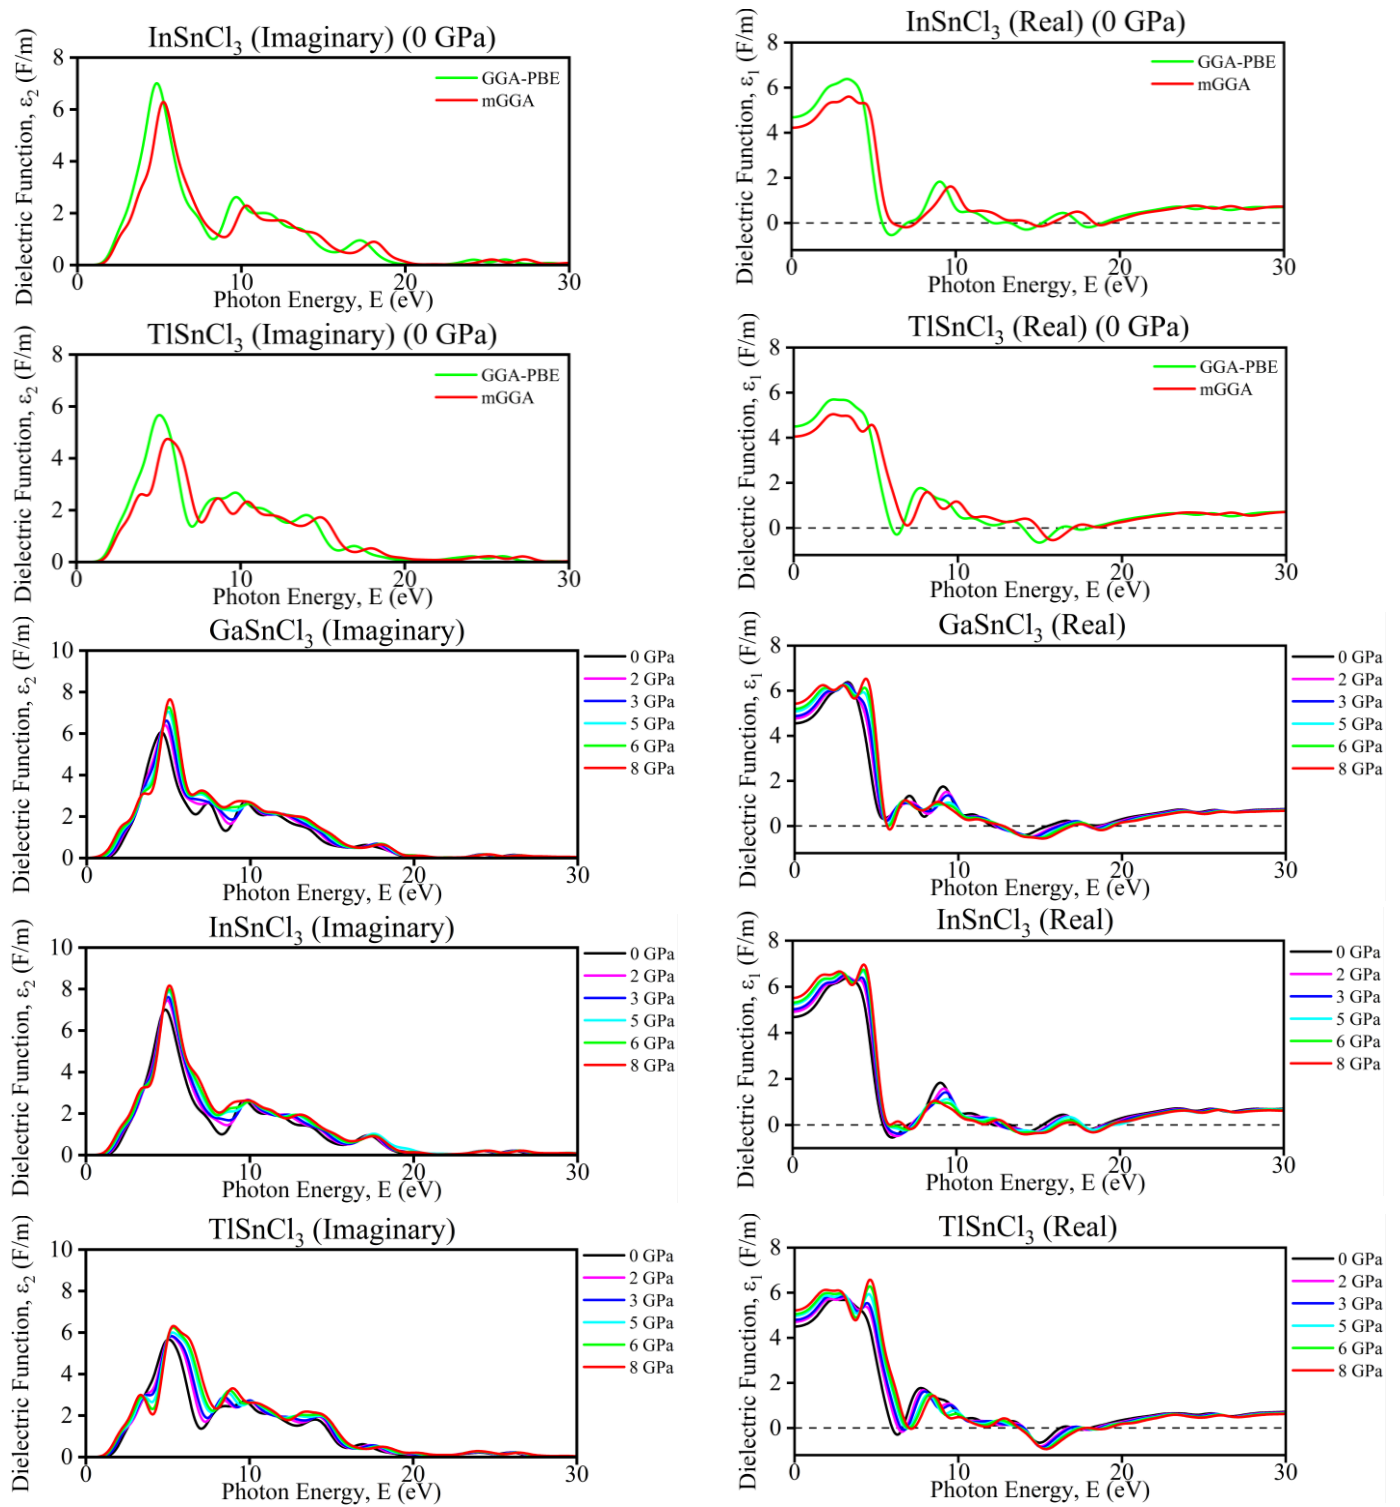

**Fig. 9. & 10.** Calculated pressure induced imaginary spectra & real spectra of dielectric function ( $\epsilon$ ) for  $\text{ASnCl}_3$  ( $A = \text{Ga}, \text{In}, \text{and Tl}$ ).

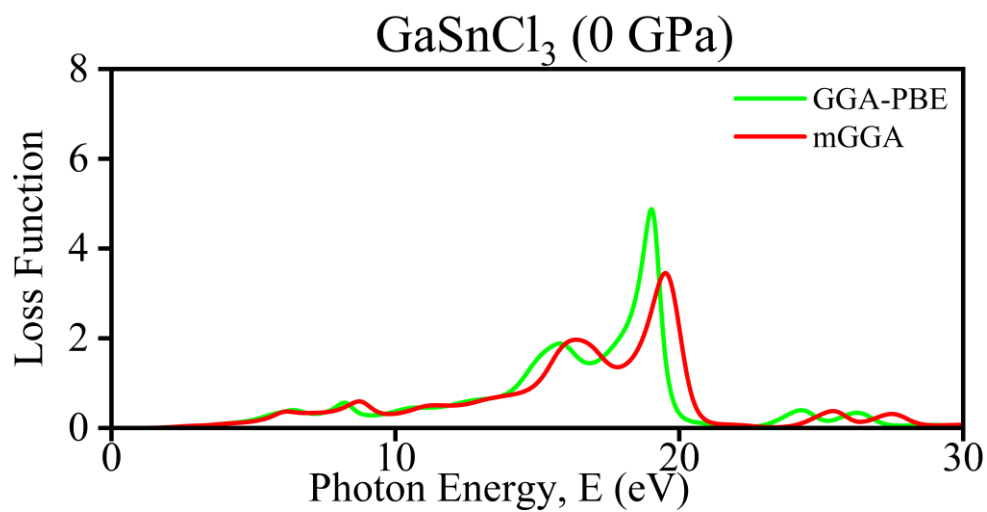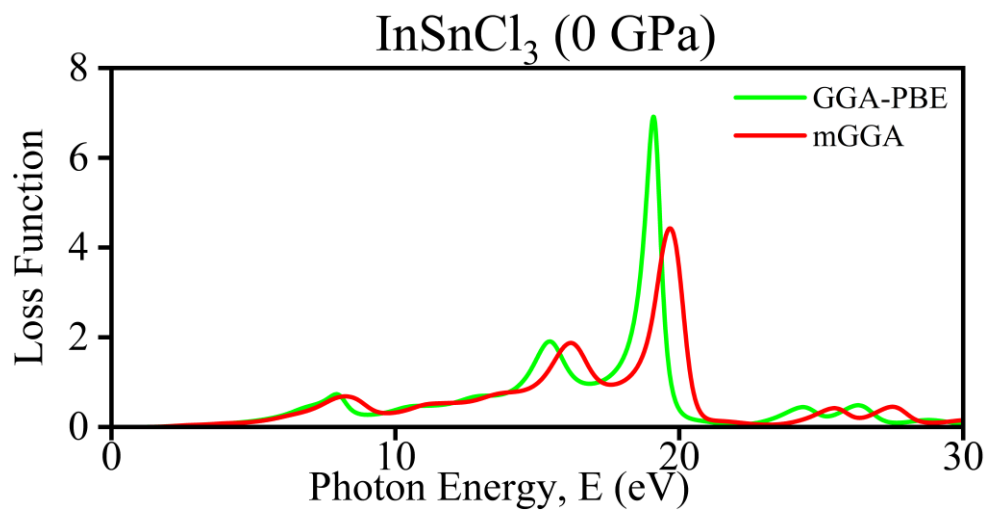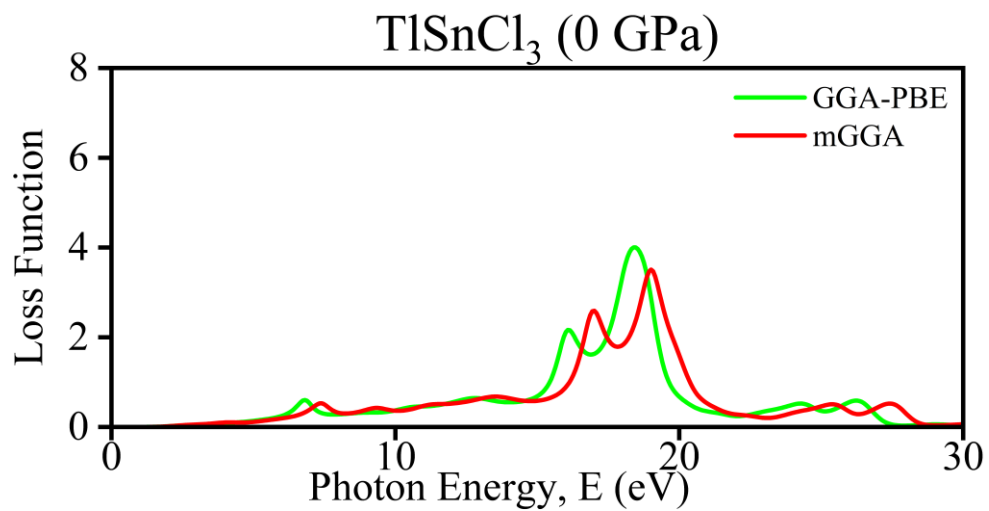

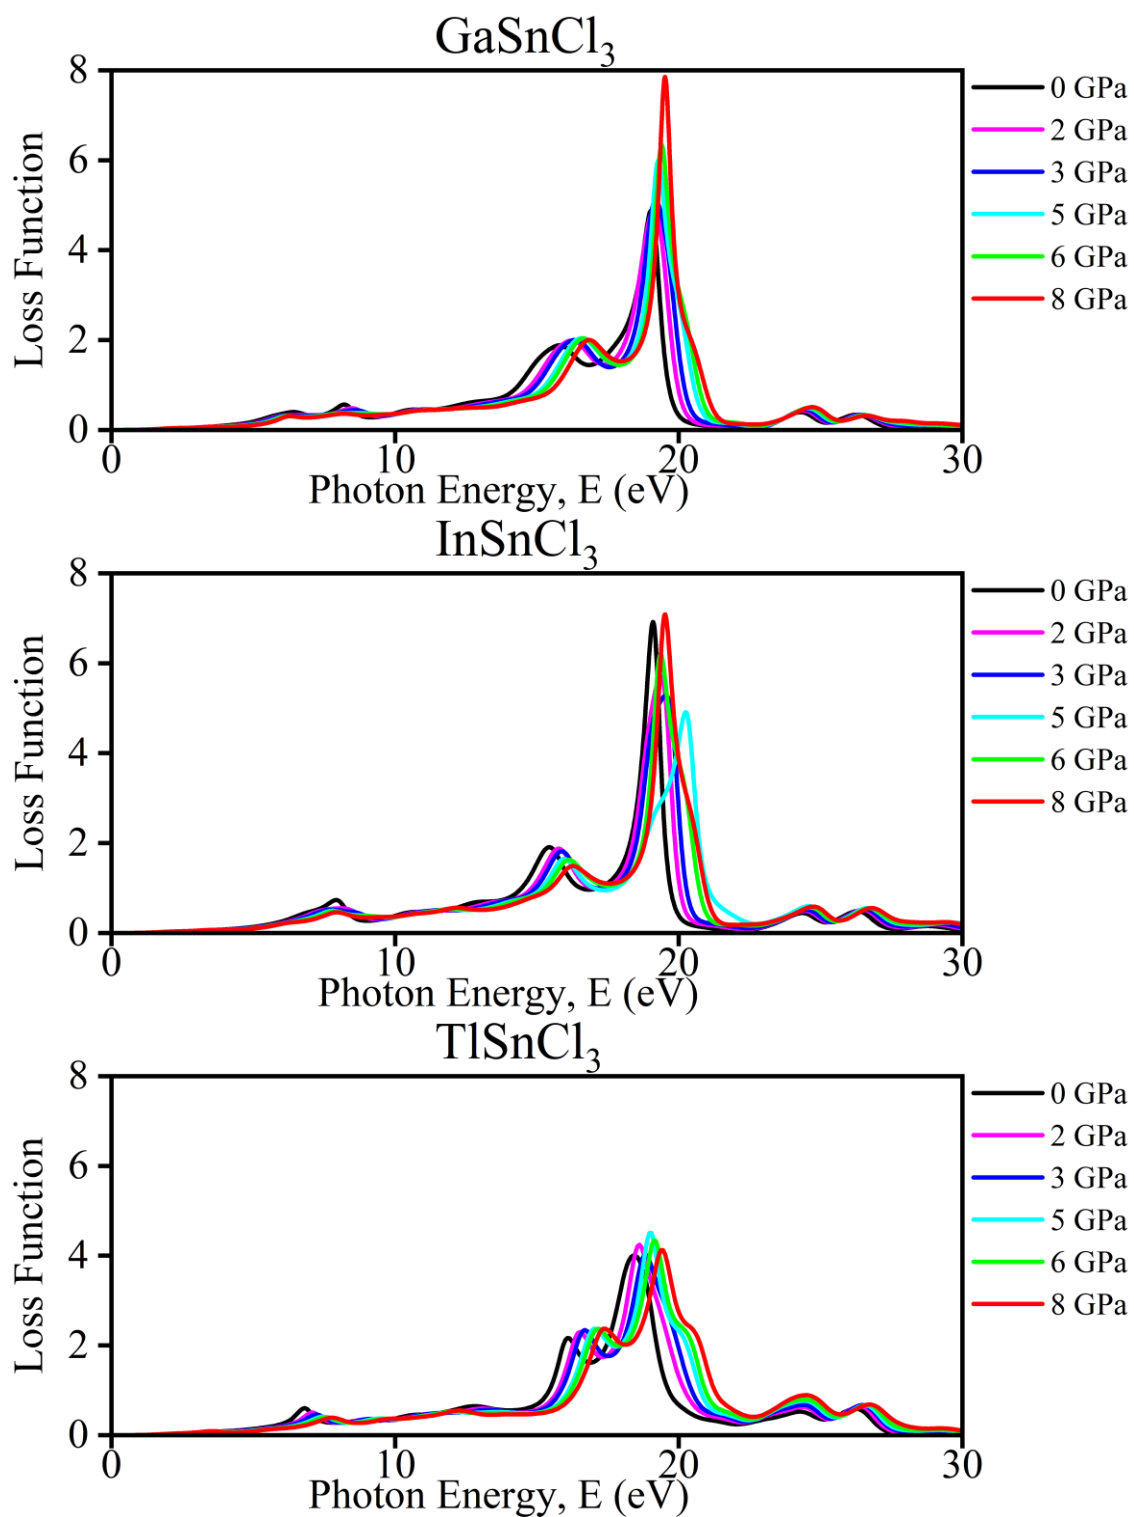

**Fig. 11.** Calculated pressure-induced spectra of loss function of  $\text{ASnCl}_3$  ( $A = \text{Ga}, \text{In}, \text{and Tl}$ ).

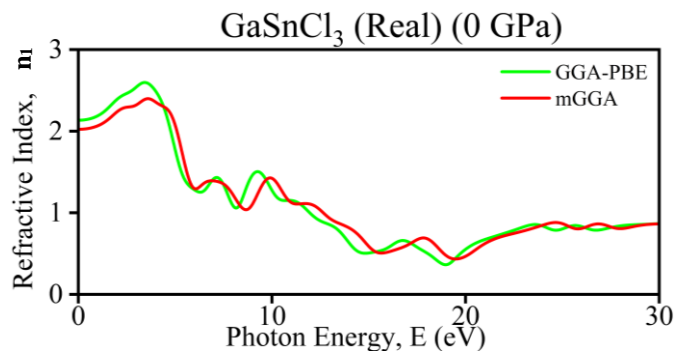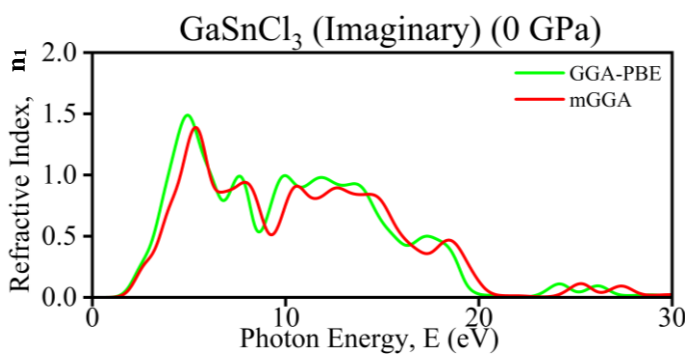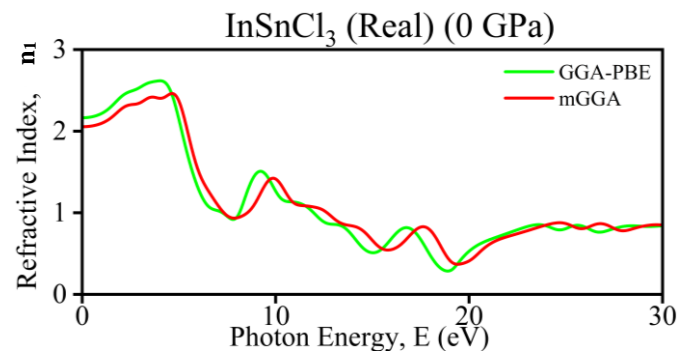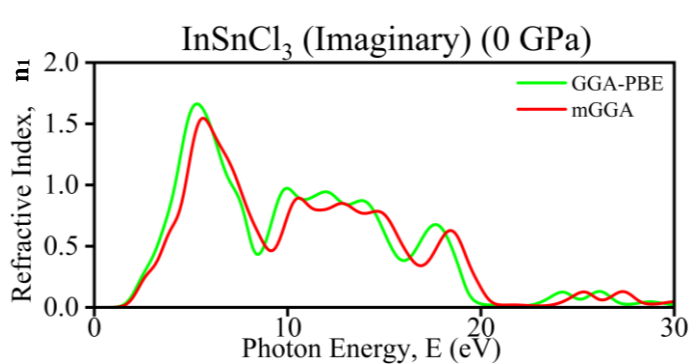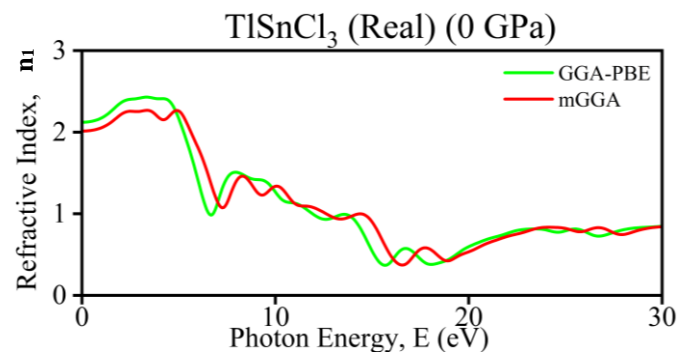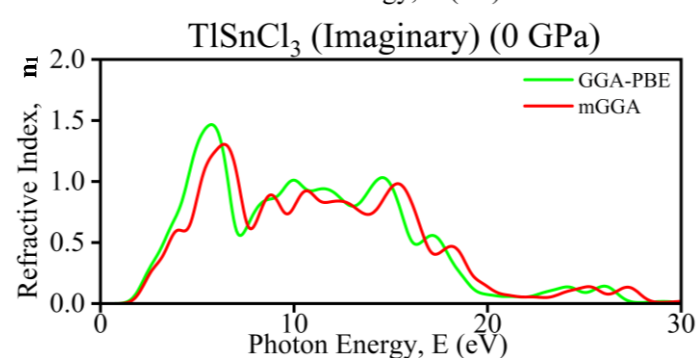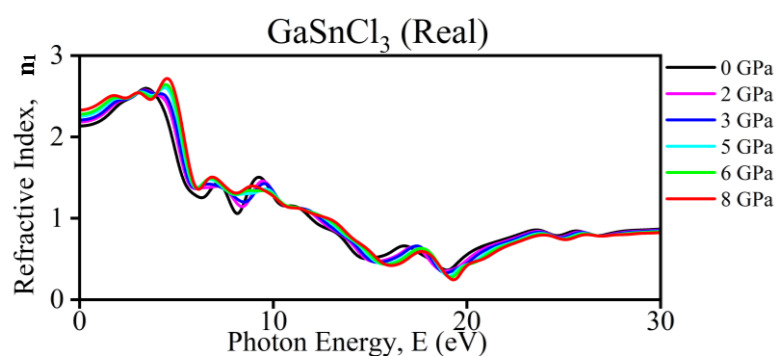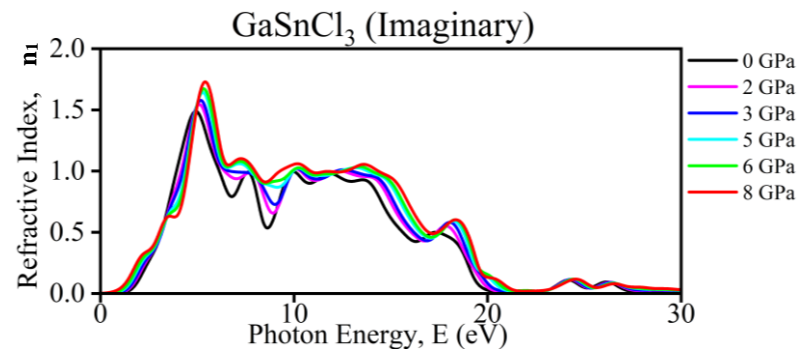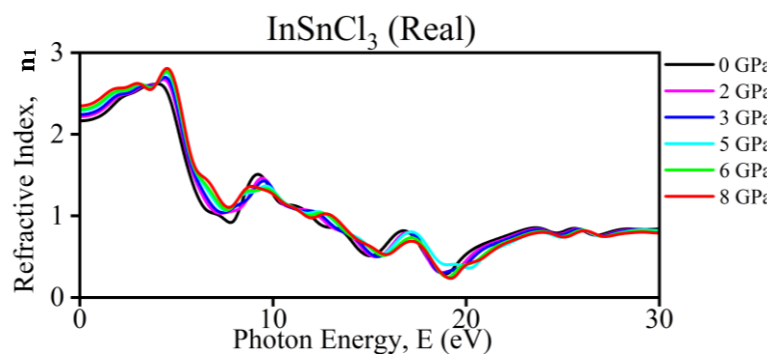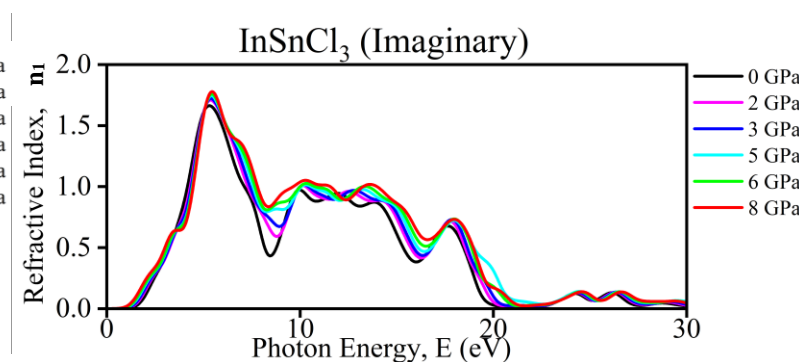

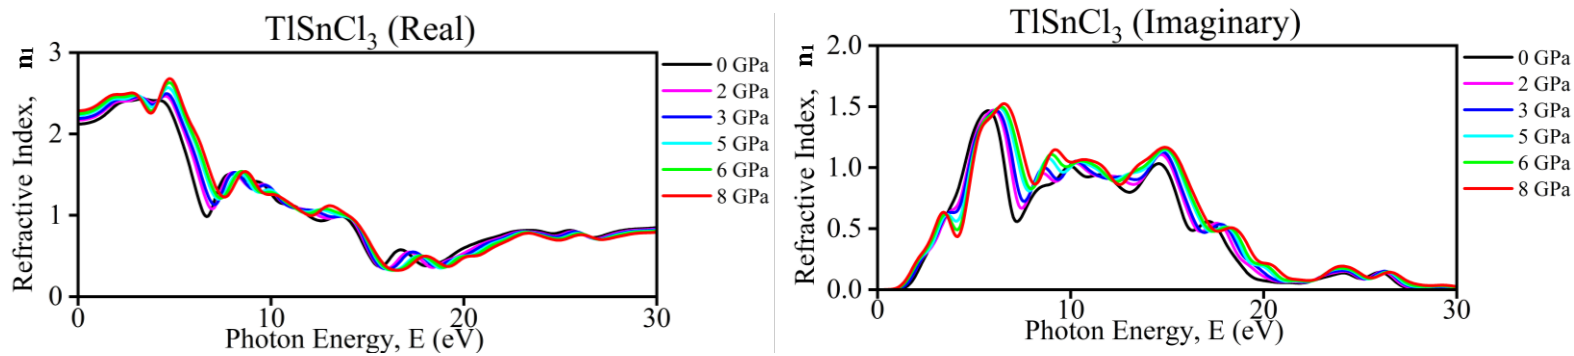

**Fig. 12.** Calculated pressure induced spectra of the Refractive index ( $n_1$ ) of  $\text{ASnCl}_3$  ( $A = \text{Ga}, \text{In},$  and  $\text{Tl}$ ).
